# Internally coupled middle ears enhance the range of interaural time differences heard by the chicken

**Running title:** Interaural time differences heard by the chicken

Christine Köppl

<sup>1</sup>Department of Neuroscience, School of Medicine and Health Sciences, Carl von Ossietzky University Oldenburg, 26129 Oldenburg, Germany

<sup>2</sup>Cluster of Excellence “Hearing4all” and Research Center Neurosensory Science, Carl von Ossietzky University Oldenburg, 26129 Oldenburg, Germany

**Email address:** [Christine.Koeppl@uol.de](mailto:Christine.Koeppl@uol.de)

**Key words:** auditory, hearing, sound localization, bird, avian, ITD

## 1 Summary statement

2 The interaural time differences that chickens can use for sound localization are significantly  
3 greater than their small head size suggests. Closed-system sound stimulation can, however,  
4 produce complex artefacts.

## 5 Abstract

6 Interaural time differences (ITD) are one of several principle cues for localizing sounds.  
7 However, ITD are in the sub-millisecond range for most animals. Because the neural  
8 processing of such small ITDs pushes the limit of temporal resolution, the precise ITD-range  
9 for a given species and its usefulness - relative to other localization cues - was a powerful  
10 selective force in the evolution of the neural circuits involved. Birds and other non-mammals  
11 have internally coupled middle ears working as pressure-difference receivers that may  
12 significantly enhance ITD, depending on the precise properties of the interaural connection.  
13 Here, the extent of this internal coupling was investigated in chickens, specifically under the  
14 same experimental conditions as typically used in neurophysiology of ITD-coding circuits, i.e.  
15 with headphone stimulation. Cochlear microphonics (CM) were recorded simultaneously  
16 from both ears of anesthetized chickens under monaural and binaural stimulation, using  
17 pure tones from 0.1 to 3 kHz. Interaural transmission peaked at 1.5 kHz at a loss of  
18 only -5.5 dB; the mean interaural delay was 264  $\mu$ s. CM amplitude strongly modulated as a  
19 function of ITD, confirming significant interaural coupling. The “ITD heard” derived from the  
20 CM phases in both ears showed enhancement, compared to the acoustic stimuli, by a factor  
21 of up to 1.8. However, the closed sound delivery systems impaired interaural transmission at  
22 low frequencies (< 1 kHz). We identify factors that need to be considered when interpreting  
23 neurophysiological data obtained under these conditions, and relating them to the natural  
24 free-field condition.

## 25 Introduction

26 Localization of sounds originating in the environment is performed without effort by humans  
27 and many animals. This apparent ease belies the complexity of the underlying physical and  
28 neurophysiological processes. There is a number of principle cues - interaural time and level  
29 differences in azimuth and spectral composition in elevation – but their availability and  
30 relative usefulness are highly dependent on the size of the animal and its frequency range of  
31 hearing (e.g., Köppl, 2009). In the low-frequency range, typically up to a few kHz, interaural  
32 time differences (ITD) are the best cue to azimuth (e.g., Hartmann, 1999). However, for all  
33 but the largest animals, ITDs remain below 1 ms and thus represent a challenge for the  
34 nervous system to encode timing and determine the interaural difference with appropriate  
35 precision. Although it is undisputed that humans and other animals with good low-frequency  
36 hearing rely on ITD for sound localization in azimuth (e.g., (Brown and May, 2005), the  
37 neural mechanisms underlying this are less clear. Several mechanisms of encoding ITD have  
38 been suggested, with good experimental evidence for each, in different species, and  
39 sometimes even in the same species (reviews in Ashida and Carr, 2011; Grothe et al., 2010;  
40 Joris and Yin, 2007; Vonderschen and Wagner, 2014). This naturally raises the question as to  
41 the constraints and specific conditions that might have favored the evolution of different  
42 mechanisms (Carr and Christensen-Dalsgaard, 2015; Carr and Christensen-Dalsgaard, 2016;  
43 Grothe and Pecka, 2014; Köppl, 2009). The precise range of ITDs available to an animal is an  
44 important argument in this discussion, but wrong assumptions have often been made about  
45 this.

46 The acoustic ITD appears to be straightforward to predict if the size of the head is known  
47 and the head is approximated as a sphere (Kuhn, 1977). At low frequencies, the maximal ITD  
48 arising from a sound source 90° to one side is  $3r/v$  (where  $r$  is the radius of the sphere and  $v$   
49 the speed of sound). However, actual measurements in a range of animal species have since  
50 shown that the acoustic ITD between the outsides of both eardrums is always larger than  
51 this prediction, typically by a factor of about 1.5 (cat: Tollin and Koka, 2009; guinea pig:  
52 Sterbing et al., 2003; gerbil: Maki and Furukawa, 2005; chinchilla: Jones et al., 2011; barn  
53 owl: Hausmann et al., 2010; Poganiatz et al., 2001; von Campenhausen and Wagner, 2006).  
54 Recently, this was also confirmed for the chicken (Schnyder et al., 2014; estimated from  
55 phase measurements shown in their Supplemental Fig. 9). Thus classic assumptions about

56 the ITD range experienced by an animal and based on a spherical head model, need to be  
57 revised upwards.

58 There is more to this issue. Both mammalian and avian species are prominent animal models  
59 for investigating the neural processing mechanisms of ITD. However, little attention has  
60 been paid in this context to a salient difference in their middle ears that has a potentially  
61 crucial impact on ITD processing. Unlike mammalian ears, the middle ears of birds are  
62 acoustically connected through skull spaces, often collectively termed the interaural canal.  
63 This internal coupling turns the ears into pressure-difference receivers, with sound reaching  
64 each eardrum from both sides. The driving force is then the instantaneous pressure  
65 difference across the eardrum, and the phase of eardrum movement is the difference  
66 between the phases of the direct and indirect component, weighed by the interaural  
67 transmission gain. Importantly, depending on the physical dimensions of the head, the  
68 sound wavelength, and the attenuation across the interaural connections, increased  
69 directional cues to sound location may be generated, including enhanced ITDs (Christensen-  
70 Dalsgaard, 2011; Michelsen and Larsen, 2008).

71 The presence of internal connections between the middle ears of birds (and, more generally,  
72 archosaurs) was demonstrated early and is undisputed (e.g., Owen, 1850; Schwartzkopff,  
73 1952; Wada, 1924). However, the presence of internal coupling between the middle ears is  
74 merely a prerequisite and in itself does not prove that significant directional cues arise from  
75 it. It is the precise degree of interaural transmission that determines whether a significant  
76 directionality actually results. These details have proven difficult to define. The morphology  
77 of the connections across the head remains ill-characterized, in large part due to the  
78 extensively pneumatized and trabeculated structure of avian bones, which generates a  
79 myriad of potential skull paths. Connections between the two sides likely include more than  
80 the classic ventral “interaural canal” (Bierman et al., 2014; Christensen-Dalsgaard, 2011;  
81 Larsen et al., 2016; Rosowski, 1979). Attempts to quantify the physiological effect of internal  
82 coupling in birds include acoustic measurements at various locations both outside and inside  
83 the skull (Hill et al., 1980; Rosowski, 1979; Rosowski and Saunders, 1980), and  
84 measurements of eardrum vibration or recordings of cochlear microphonics as a proxy for  
85 eardrum vibration (Calford and Piddington, 1988; Hyson et al., 1994; Klump and Larsen,  
86 1992; Larsen et al., 2006; Lewald, 1990; Moiseff, 1989; Rosowski, 1979). Conclusions about

87 the significance of interaural connections varied widely (reviewed by Christensen-Dalsgaard,  
88 2005; Klump, 2000), no doubt further complicated by the discovery of a major source of  
89 experimental artefact, the buildup of negative middle-ear pressure under anesthesia (Larsen  
90 et al., 2016; Larsen et al., 1997).

91 The present study aimed to re-investigate the effect of internally coupled ears in the  
92 chicken, with a specific emphasis on ITD. The chicken is a well-studied animal model in the  
93 context of neural ITD coding. The possibility of internal coupling of the ears raises a serious  
94 problem for the controlled presentation of ITD, which is typically done via headphones when  
95 testing neural selectivity for ITD: In this situation, the acoustically presented ITD may not be  
96 the ITD heard by the bird, and this confounds the interpretation of neural responses. It is  
97 therefore important to quantify the effect of internal coupling of the ears for the species in  
98 question.

## 99 Material and Methods

### 100 *Animal anesthesia and homeostasis*

101 Cochlear microphonics were recorded in 8 chickens (*Gallus gallus domesticus*) of commercial  
102 egglayer breeds, aged posthatching day (P) 28 to 37, and weighing between 100 and 200g.  
103 Their head widths, measured with calipers between the entrances to the ear canals, were  
104 22-23 mm. Chickens were deprived of food for at least 2 hours, in preparation for anesthesia  
105 that was initiated by injecting 20mg/kg ketamine hydrochloride and 3mg/kg xylazine  
106 intramuscularly. Supplementary doses were adjusted individually, at 50 – 100 % of the initial,  
107 usually every 30 - 50 minutes. The primary monitor for depth of anesthesia was a combined  
108 EKG- and muscle-potential recording via insect needles inserted into the muscles of a leg and  
109 the contralateral wing. This signal was amplified (Grass P15) and constantly displayed on an  
110 oscilloscope. Cloacal temperature was held constant at 41.5° via a feedback-controlled  
111 heating blanket (World Precision Instruments, Sarasota, USA) wrapped around the chicken's  
112 body. The trachea was exposed in the neck region, cut and intubated with a short piece of  
113 matching tubing to prevent problems from salivation; through this, chickens breathed  
114 normal room air unaided. The chicken's head was wrapped with strips of plaster-of-Paris,

115 which was connected to a metal head holder by dental cement, to fix the head in a defined  
116 position.

### 117 *Electrode placement and recordings*

118 Bilateral surgical openings through the neck muscles and underlying bone provided access to  
119 the middle-ear spaces. Electrodes custom-made of insulated silver wire with a small bare  
120 silver ball at the end were inserted and the silver ball placed onto the membrane covering  
121 the recessus scalae tympani. In a few cases, the membrane was slit and electrodes inserted  
122 into scala tympani. This increased the recorded CM amplitudes somewhat but did not  
123 provide sufficient advantage to adopt routinely. Electrodes were glued into place on the  
124 skull's surface with tissue glue and dental cement. Reference electrodes were placed under  
125 the skin nearby and were either silver ball electrodes of the same type, separate for left and  
126 right (4 experiments) or an Ag/AgCl pellet shared for both channels (4 experiments). The  
127 surgical holes were left open during all measurements, thus ensuring middle-ear ventilation.  
128 Signals were amplified x500,000 by a Tucker-Davis Technologies (TDT, Alachua, USA) DB4  
129 amplifier, bandpass filtered at 100 Hz to 15 kHz, and the two channels fed to the inputs of a  
130 TDT DD1 A/D converter that was connected to a TDT AP2 signal processing board. Data  
131 acquisition of the analog waveforms was controlled by custom-written software ("XDPHYS"  
132 by the laboratory of M. Konishi, Caltech, USA).

### 133 *Sound stimulation*

134 Sound stimulation was through custom-made closed sound systems placed at the entrance  
135 of both ear canals. They contained a standard earphone (Sony MDR-E818LP) and calibrated  
136 miniature microphone (Knowles EM 3068) each. Microphone signals were amplified 40 dB  
137 by a custom-built amplifier. Sound-pressure levels and phases were calibrated individually at  
138 the start of each experiment and the calibrations used to adjust stimulus presentation online  
139 by custom-written software (xdphys, Caltech). Near-constant sound pressures down to the  
140 lowest frequency of 100 Hz suggested closed-system conditions, although no sealing agents  
141 were applied. Sealing was likely achieved through the feathers surrounding the ear canals.  
142 Stimuli were generated separately for the two ears using a TDT AP2 signal processing board.  
143 Both channels were fed to the earphones via D/A converters (TDT DD1), anti-aliasing filters

144 (TDT FT6-2) and attenuators (TDT PA4). Stimuli were tone bursts of 50ms duration (including  
145 5ms linear ramps), presented at a rate of 5/sec.

#### 146 *Data collection and analysis*

147 Monaural stimulation was usually tested at 8 standard frequencies (100, 333, 571, 1000,  
148 1515, 2000, 2500 and 3030 Hz), at 40 to 80 dB SPL, in 10 dB steps. Responses to 200  
149 repetitions of each stimulus were recorded.

150 The same standard frequencies were also tested binaurally, usually at two levels, 50 and 70  
151 dB SPL. With binaural stimulation, ITD was also varied, within  $\pm$  one stimulus period, in 10  
152 steps per period. Repetitions were reduced from 200 to 50 for the higher level.

153 Recordings of the analog waveforms from left and right ears were always obtained  
154 simultaneously, regardless of whether the stimulation was monaural or binaural. An  
155 averaged analog response waveform was derived for each stimulus condition and contained  
156 both the compound action potential (CAP) and the cochlear microphonic (CM). Only the  
157 steady-state response between 15 and 45 ms re. stimulus onset was used for analysis, thus  
158 minimizing the neural component. A cosine function at the stimulus frequency was fitted  
159 and the amplitude and phase of this fit taken as the CM amplitude and phase. To eliminate  
160 recordings of insufficient signal-to-noise ratio, the fit amplitude was divided by the standard  
161 deviation of the averaged waveform  $\times \sqrt{2}$ . The value of the resulting index is 1 if the  
162 waveform is identical to the fitted cosine and becomes zero if the waveform contains no  
163 stimulus frequency component (Köppl and Carr, 2008). Data were discarded if this index was  
164 below 0.5 for monaural recordings or, for binaural recordings, if it remained below 0.5 at all  
165 ITDs tested. If the CM amplitudes in binaural recordings showed an appreciable modulation  
166 with ITD, this ITD function was then fitted with a cosine function at the respective stimulus  
167 frequency (Viete et al., 1997) to determine peak ITD, defined as the peak closest to zero ITD.

#### 168 *Acoustic measurements*

169 In 3 chickens, the readings of the microphones integral to our sound systems were recorded  
170 under selected stimulation conditions by feeding their output (instead of the electrode  
171 recordings) into the A/D converter. Data analysis was exactly analogous to the procedures  
172 described above for CM recordings. The noise level of the microphones, estimated as the SPL

173 where the readings exceeded the S/N criterion of 0.5 (see previous section) was 30 – 35 dB  
174 SPL.

### 175 *Blockage of interaural connections*

176 In the same 3 chickens, an attempt was also made to block interaural connections. The ear  
177 canal on one side was widened through a small skin cut to gain access to the eardrum. The  
178 eardrum was pierced with a syringe loaded with petroleum jelly and jelly injected slowly  
179 behind the eardrum. The jelly appeared to liquefy quickly at the birds' normal body  
180 temperature. Injection was stopped when the jelly began to exude to the outside of the  
181 eardrum. The sound system was re-positioned, both sides were re-calibrated and selected  
182 measurements repeated. In 2 of the 3 chickens, the skin cut was closed again with tissue  
183 glue in order to restore the ear canal as much as possible. Since these manipulations  
184 potentially not only blocked the interaural connections but also damaged the middle and  
185 inner ear on the manipulated side, only recordings of the unmanipulated ear were  
186 subsequently used. After euthanasia at the conclusion of the experiments, the chickens'  
187 heads were placed in a refrigerator overnight to solidify the petroleum jelly. Care was taken  
188 to keep the head's spatial orientation unchanged. Placement of the petroleum jelly was  
189 visualized by dissection on the next day.

## 190 Results

### 191 *Dependence of monaural CM measurements on sound level*

192 CM recordings under monaural stimulation were obtained at several sound levels, generally  
193 between 40 and 80 dB SPL, in 10 dB steps. In the ipsilateral ear, CM amplitudes were mostly  
194 above our criterion for S/N ratio at all those levels, i.e. the thresholds were 40 dB SPL or  
195 lower. Ipsilateral CM amplitude increased in a nearly linear fashion between 50 and 80 dB  
196 SPL at all frequencies (Fig. 1, top row of panels). In order to remain within this dynamic  
197 range in which CM amplitude was thus a reliable indicator of relative sound level, all  
198 comparisons between ipsi- and contralateral CM readings reported below were made at 70  
199 dB SPL stimulus level. CM amplitudes in the two ears of a given animal, and at a given sound  
200 level, were generally similar. However, if there was an asymmetry, for unknown reasons



201 there was an overall bias for higher amplitudes in the left ear. Comparisons between ipsi-  
202 and contralateral CM readings were therefore consistently carried out between matched  
203 recordings of the same ear to stimulation from the ipsi- and contralateral side, respectively  
204 (as opposed to simultaneous readings of the two CM recorded to stimulation of a given ear;  
205 schematically illustrated in Fig. 2A).

206 The phase of the CM was nearly invariant with level. Variations were not systematic and  
207 typically less than  $30^\circ$  over a 30 dB range. Examples are shown in Fig. 1, bottom row of  
208 panels.

### 209 *CM measurements of interaural transmission amplitude and delay*

210 Interaural transmission was determined by comparing CM amplitudes from the same ear  
211 upon stimulation with 70 dB SPL from the ipsi- and contralateral side (Fig. 2A). Transmission  
212 was expressed as the ratio of contra- to ipsilateral CM amplitude, comparable to the  
213 amplitude transmission gain derived from eardrum vibration measurements (Michelsen and  
214 Larsen, 2008). Amplitude transmission gain was maximal, at a median value of 0.53, at 1.5  
215 kHz (Fig. 2 B), corresponding to -5.5 dB attenuation. Minimal transmission, with gain values  
216 below 0.1 (equivalent to >20 dB attenuation), was observed at frequencies below 1 kHz.

217 Interaural delay was estimated in two different ways. First, a fixed delay should, with  
218 increasing frequency, result in a linearly rising phase accumulation in the contralateral CM.  
219 Indeed, the unwrapped plot of phase as a function of frequency was reasonably fit by a  
220 linear regression with a slope corresponding to a time delay of  $264 \mu\text{s}$  (Fig. 3). The phase of  
221 the ipsilateral CM varied randomly over frequency, indicating no or only very small (acoustic  
222 and transduction) delays. Second, to examine more closely for any frequency dependence,  
223 the phase difference between the paired, same-ear CM measurements upon ipsi- and  
224 contralateral stimulation was determined and converted to the corresponding time delay.  
225 The phase of the contralateral CM was inverted by  $180^\circ$  before this comparison, to account  
226 for the fact that the same stimulus phase which causes inward motion of the ipsilateral  
227 eardrum will cause outward motion of the contralateral eardrum after travelling through the  
228 interaural connections, and will thus trigger an inverted CM response (Rosowski and  
229 Saunders, 1980; Larsen et al., 2006). With pure-tone stimulation, as used here, the phase  
230 comparison carries an inherent cyclic ambiguity. No assumptions were made about which

231 side should be leading, thus the reported phase differences are minimal values. As expected,  
232 these phase differences showed a similar frequency dependence as the contralateral CM  
233 phase readings alone. However, after converting to time differences, the deviations from  
234 linearity became apparent as a systematic decrease of interaural delay with increasing  
235 frequency. There was an initial drastic decrease from nearly 4000  $\mu\text{s}$  at 100 Hz to a median  
236 value of 380  $\mu\text{s}$  at 1 kHz, and a subsequent shallower decline to a median of 264  $\mu\text{s}$  at 3 kHz  
237 (Fig. 3B).

238 After blocking the interaural connections, the great majority of contralateral CM signals that  
239 had initially been above criterion disappeared into the noise (44 of 55, or 80%, over all  
240 frequencies and levels). The few that still met criterion showed both significant reductions in  
241 amplitude and significant phase shifts, compared to the unblocked condition (Wilcoxon  
242 tests,  $p < 0.01$ ,  $n = 11$ ). Ipsilateral CM amplitudes and phases were unaffected. After  
243 blockage, interaural attenuation was generally above 30 dB and independent of frequency.  
244 Careful dissection of the manipulated heads after the experiment showed that the injected  
245 petroleum jelly had accumulated behind the eardrum and from there primarily ventral. The  
246 connection that is commonly called the interaural canal (Larsen et al., 2016) had been filled  
247 to approximately the skull's midline.

#### 248 *Amplitude modulation of a given-ear CM with binaural stimulation of varying ITD*

249 Upon binaural stimulation with equal sound levels, but varying ITD, CM amplitudes clearly  
250 modulated with ITD (example in Fig. 4A). This is the equivalent of the directionality of  
251 eardrum vibration shown with free-field stimulation (review in (Christensen-Dalsgaard,  
252 2011)). Without any internal coupling, both CM amplitudes are expected to remain  
253 unaffected by the varying ITD, as binaural sound levels were kept constant. If significant  
254 internal coupling exists, CM amplitudes are expected to modulate in an ITD-dependent  
255 fashion, as eardrum vibration would modulate as a function of azimuthal sound-source  
256 position in the free field. The extent of this modulation was quantified as the ratio of  
257 maximal to minimal amplitude over a range of  $\pm$  one period of ITD at the respective test  
258 frequency, and termed the ITD modulation ratio. This ITD modulation ratio was equal in both  
259 ears (Wilcoxon test,  $p = 0.372$ ,  $n = 115$ ). However, it clearly varied with frequency. Maximal  
260 ITD modulation ratios occurred at 1.5 and 2 kHz, with median values of 2.22 and 1.99 (max.  
261 6.01). Ratios decreased towards both lower and higher frequencies (Fig. 4B), mirroring the

262 frequency dependence of interaural transmission. Median modulation ratios were  
263 consistently higher at 50 dB SPL as compared to 70 dB SPL. However, this difference was  
264 only significant for low frequencies. At 1 kHz and above, modulation ratios did not differ  
265 significantly with sound level (Fig. 4B; Mann-Whitney U-tests, p below or above 0.05,  
266 respectively).

267 Importantly, the modulation of CM amplitude with ITD was consistently abolished upon  
268 blockage of the interaural connections (Fig. 4A, C). Because our method of blockage from  
269 one side also impaired the ear ipsilateral to the manipulation, only the remaining good,  
270 contralateral ear could be evaluated. ITD modulation ratios in the remaining good ear never  
271 exceeded 1.09 at all frequencies (median values 1.01 – 1.04, Fig. 4C).

272 On average, the CM showed consistently higher maximal amplitudes and lower minimal  
273 amplitudes in the binaural condition, compared to monaural stimulation at the same sound  
274 levels. This suggests both constructive and destructive phase interference with binaural  
275 input. However, a frequency dependence was also obvious. CM maximal amplitudes at  
276 frequencies between 1 and 2.5 kHz to binaural stimulation at 70 dB SPL were reliably  
277 reduced after blockage of the interaural connections (same individual ears compared; only  
278 unmanipulated side; example in Fig. 4A). In contrast, the amplitude change was more  
279 variable for lower frequencies and at 3030 Hz, with 2 out of 3 ears actually showing  
280 enhanced amplitudes after blockage of the interaural connections, suggesting a  
281 predominantly destructive interaction in the normal binaural condition at those frequencies.

#### 282 *Comparison of ITD presented to ITD heard*

283 Next, we used the phases of simultaneously recorded left and right CMs under binaural  
284 stimulation to derive the actual ITD that the animal experienced, the “ITD heard”. This is the  
285 analogous comparison to that performed by neurons in the binaural nucleus laminaris (e.g.,  
286 Ashida and Carr, 2011). Phase differences were disambiguated and unwrapped, assuming  
287 that the difference that corresponded most closely to the acoustically presented ITD was the  
288 correct one (examples in Fig. 5A, E). In other words, we assumed that the actual phase  
289 difference could not differ from the presented one by more than 180°.

290 The ITD heard commonly deviated systematically from the acoustically presented ITD. Many  
291 recordings showed two components to this: a constant offset from the expected

292 (acoustically presented) ITD and an ITD-dependent deviation cycling at the period of the  
293 stimulation frequency. The constant offset was quantified as the y-axis intercept of the  
294 linear regression of ITD heard as a function of ITD presented (examples in Fig. 5B, F). The  
295 offset appeared to vary randomly within mostly  $\pm 50$  degrees (0.15 cycles), independent of  
296 frequency or sound level. However, there was a tendency for this offset to show a consistent  
297 polarity in a given animal. We therefore assumed it to be an artefact of slightly asymmetric  
298 recording conditions between the two ears. The offset was subtracted from all  
299 measurements and the unbiased difference between the ITD heard and the ITD presented  
300 was derived (examples in Fig. 5C, G). To highlight whether this deviation would have  
301 enhanced or reduced the perceived ITD relative to the acoustically presented ITD, the ratio  
302 between them was also determined (Fig. 5D, H). Note that ratios above 1 indicate a larger  
303 ITD heard, ratios below 1 a smaller ITD heard.

304 For both examples shown in Fig. 5, the largest ratios occurred around zero ITD, suggesting  
305 that the deviations would act to enhance ITDs in the chicken's natural range. This was also  
306 typical at the population level. Figure 6 shows median data for 4 frequencies, at both sound  
307 levels tested, 50 and 70 dB SPL. Median ratios were generally positive around the acoustic  
308 midline, with the exception of 333 Hz (Fig. 6, second row), where the ratios were negative,  
309 suggesting an unfavourable compression of the ITD range heard. A further, unexpected  
310 observation was that the extent of enhancement (or compression, at 333 Hz) could be level-  
311 dependent. Ratios were often, but not universally, higher at 50 dB SPL than at 70 dB SPL  
312 (Fig. 6). The highest median ratio, 1.86 at 1515 Hz and 70 dB SPL, suggested an enlargement  
313 of the ITD heard by a factor of 1.8, compared to the acoustically presented ITD.

314 Finally, a prediction was derived from these data about the ITDs that the chicken should hear  
315 when a sound source originates in the free field from  $90^\circ$  to one side. For this, a value for the  
316 maximal acoustic ITD between the chicken's ear canals needed to be chosen. According to  
317 the spherical head model of (Kuhn, 1977), an acoustic ITD of  $100 \mu\text{s}$  should occur for  
318 chickens with a head width of 23 mm (as used here), or  $130 \mu\text{s}$  for adult chickens with 30  
319 mm head width. Acoustic ITD actually measured were around  $170 \mu\text{s}$  for adult chickens  
320 (Schnyder et al., 2014; estimated from phase measurements shown in their Supplemental  
321 Fig. 9). As a best educated guess, we then calculated ITDs heard for  $130 \mu\text{s}$  acoustically  
322 presented ITD. The prediction was derived by linear interpolation between adjacent data

323 points, averaging ipsi- and contralateral leading ITDs (i.e., assuming symmetry), and finally  
324 averaging the predictions derived from measurements at 50 and 70 dB SPL. Figure 7 shows  
325 the result together with previously published data (see Discussion).

### 326 *Acoustical measurements of interaural transmission amplitude and delay*

327 Acoustic measurements were derived in three chickens, using the microphones integral to  
328 the closed sound systems. These microphones were coupled to calibrated probe tubes that  
329 opened at the entrance to the chicken's ear canal. Analogous to the CM analysis, interaural  
330 transmission was determined by comparing the readings from the same microphone upon  
331 stimulation with 70 dB SPL from the ipsi- and contralateral side, respectively. Transmission  
332 was again expressed as the ratio of contra- to ipsilateral amplitude reading. Acoustic  
333 interaural transmission was very consistent across animals but much lower than that shown  
334 by the CM measurements. Median values remained below 0.1 (equivalent to >20 dB  
335 attenuation) at all frequencies. Acoustic measurements also showed a different frequency  
336 dependence, with minimal transmission between 571 and 1515 Hz, and slightly rising  
337 towards both lower and higher frequencies (Fig. 7A). Measurements above 1.7 kHz were  
338 likely contaminated by artefacts (see next paragraph) and are thus shown in grey.

339 Interaural acoustic delay was first estimated from the slope of the phase accumulation  
340 across frequency at the contralateral microphone. This very clearly showed two  
341 components: a linear phase accumulation corresponding to a delay of 544  $\mu$ s at frequencies  
342 up to 1.7 kHz, followed by a break to a much shallower slope, corresponding to a delay of  
343 only 17  $\mu$ s at frequencies above 1.7 kHz (Fig. 7B). This suggests direct electrical pick-up  
344 across channels at higher frequencies. The value at lower frequencies was likely a truly  
345 acoustic delay.

346 Secondly, interaural acoustic delay was determined from the phase difference between both  
347 microphone readings. Only frequencies up to 1515 Hz were included, to minimize the  
348 influence of electrical cross-talk shown above. We tried to resolve cyclic ambiguity by  
349 measuring down to a very low frequency of 100 Hz, where the period was expected to far  
350 exceed the interaural delay. Furthermore, a fixed interaural delay should result in a linearly  
351 rising phase difference with increasing frequency. Lastly, it was assumed that the phase  
352 reading upon ipsilateral stimulation should lead that with contralateral stimulation.

353 However, the data did not clearly conform to those expectations. At 100 Hz, the ipsilateral  
354 readings consistently led the contralateral ones by a median of 81 degrees, corresponding to  
355 a delay of 2250  $\mu\text{s}$  (Fig. 7C, D). However, assuming a continuing ipsilateral lead yielded phase  
356 differences which smoothly *decreased* (instead of increased) towards higher frequencies  
357 (Fig. 7C, black data). This translated into a corresponding decrease in interaural acoustic  
358 delay, down to a median value of 327  $\mu\text{s}$  at 1515 Hz (Fig. 7D, black data). Abandoning the  
359 assumption of an ipsilateral lead and taking the shorter of the two possible leads in each  
360 case, led to a highly nonlinear phase-frequency relation (Fig. 7C, blue data). This translated  
361 to generally shorter interaural acoustic delays, between 100 and 330  $\mu\text{s}$ , except at 100 Hz,  
362 where the median remained at 2250  $\mu\text{s}$  (Fig. 7D, blue data).

363 After blocking interaural connections, at frequencies up to 1.7 kHz, contralateral microphone  
364 readings that had shown a significant signal in the unblocked condition dropped below  
365 criterion in nearly half the cases (7 of 18). Readings that remained above criterion did not  
366 show a mean change in either level or phase (Wilcoxon test,  $P > 0.05$ ,  $n = 11$ ). At higher  
367 frequencies, all contralateral microphone readings remained essentially unchanged after  
368 blocking interaural connections, which is consistent with the above conclusion of electrical  
369 pick-up. Even disregarding the higher frequencies, these observations nevertheless suggest  
370 that the blockage of interaural connections was either incomplete or that significant other  
371 sound paths existed.

## 372 Discussion

373 The present study obtained clear evidence for a significant modulation of the sound  
374 localization cue ITD experienced by the chicken, relative to that presented acoustically to  
375 each ear. This modulation was shown to be mediated by the physical coupling between the  
376 middle ears, because blocking the interaural connection abolished the modulation. Data  
377 from zebra finch, pigeon and alligator suggest the presence of several distinct connective  
378 pathways across the head, including the most easily identified, ventrally directed interaural  
379 canal (Bierman et al., 2014; Larsen et al., 2016; Rosowski, 1979). The blocking experiments  
380 reported here are consistent with the existence of additional pathways in the chicken, too.  
381 Visual inspection suggested that the block typically filled the space immediately behind the

382 eardrum and the ventral interaural canal, on the injected side. Although this largely  
383 eliminated all ipsilateral CM responses and bilateral CM recordings were no longer possible  
384 after the block, the acoustic measurements by microphones in the ear canals indicated some  
385 remaining crosstalk.

386 Some previous studies had already suggested that ITD was being significantly modulated by  
387 internally coupled middle ears, both in chickens (Hyson et al., 1994) and other avian species  
388 (Calford and Piddington, 1988; Larsen et al., 2006; Rosowski, 1979). Other studies, however,  
389 remained unconvinced of any significant physiological coupling (Klump and Larsen, 1992;  
390 Lewald, 1990). The specific value added by the present study is severalfold: 1) The chicken is  
391 a popular model species in auditory localization research. These are the first measurements  
392 of interaural transmission and delay in chickens that consciously avoided the confounding  
393 artefact of negative pressure buildup in the middle ear under anesthesia. 2) By using  
394 cochlear microphonics, most of the frequency range that is relevant to the chicken and many  
395 other birds could be probed, including low frequencies down to 100 Hz. 3) ITD was  
396 determined in the same individuals. By stimulating through closed sound systems, a  
397 situation typically used in neurophysiological tests for ITD selectivity was replicated.

#### 398 *Validity of CM measurements as a proxy for eardrum vibration*

399 Different methods have been employed to experimentally verify the effect of internally  
400 coupled ears. Arguably the most elegant and direct way is to measure eardrum vibration in  
401 the intact animal, using laser Doppler vibrometry (review in Michelsen and Larsen, 2008)  
402 which, ideally, avoids any kind of invasive manipulation. However, an important limitation is  
403 the often inadequate signal-to-noise ratio at low frequencies, below 1 to 2 kHz. This excludes  
404 a substantial part of the frequency range of interest in the debate about ITD cues and their  
405 neural coding. Furthermore, aiming a laser beam onto the eardrum is, in practice, difficult to  
406 combine with the use of closed sound systems. Measurements of CM, on the other hand,  
407 while not suffering the above restrictions, are only an indirect correlate of eardrum motion.  
408 Although it is undisputed that hair-cell responses are the principal source of the CM, the  
409 source distribution within the cochlea upon stimulation with different frequencies is not well  
410 characterized in birds (Köppl and Gleich, 2007).

411 An important prerequisite to using the CM as a proxy for eardrum vibration is that it behaves  
412 linearly within the SPL range of measurements. This was satisfied here. CM amplitudes grew  
413 linearly with sound level up to 80 dB SPL (Fig. 1, top row of panels). Important for phase  
414 comparisons, the phase of the CM was, on average, invariant with level (Fig. 1, bottom row  
415 of panels), consistent with the findings of Calford and Piddington (1988) in quails. Small  
416 nonlinearities are difficult to exclude and are the likely cause for the minor level  
417 dependencies observed in binaural data (Fig. 6). One likely source of nonlinearity is a  
418 different (larger) set of hair-cell generators at higher sound levels. Another possibility is  
419 efferent feedback to the hair cells which could conceivably occur within the analysis window  
420 used here (Kaiser and Manley, 1994). In contrast, the middle-ear reflex is only triggered  
421 during vocalization in chickens (Counter and Borg, 1979; Larsen et al., 1997) and was thus  
422 not likely in the present experiments.

#### 423 *Comparison with previous estimates of interaural transmission and delay in birds*

424 Previous studies in different bird species did not universally agree on the principle existence  
425 of significant internal coupling between the middle-ear spaces. A large part of the variation  
426 between studies is likely due to two experimental artefacts that reduce interaural  
427 transmission in a frequency-specific manner, as compared to the natural situation of an  
428 awake bird in the acoustic free field. One of these detrimental conditions is the potential  
429 build-up of negative middle-ear pressure in anaesthetized birds (Larsen et al., 2016; Larsen  
430 et al., 1997). The occurrence and extent of this artefact are highly variable and species-  
431 specific and may thus have led to decreased estimates of interaural coupling in earlier  
432 studies (lack of awareness of the problem) to unknown degrees. Indeed, interaural  
433 transmission values obtained in awake birds or under anesthesia but with middle-ear  
434 ventilation ensured, tend to be the highest reported: around a maximal gain of 0.55 or -5 dB  
435 attenuation (Larsen et al., 1997) and 0.3 or -10 dB (Larsen et al., 2006) for anesthetized and  
436 awake budgerigars, respectively, 0.5 or -6 dB in the anaesthetized barn owl (Kettler et al.,  
437 2016), and 0.53 or -5.5 dB in the present study for anesthetized chickens.

438 Furthermore, there is evidence that sealing closed sound delivery systems to the ear canal(s)  
439 also acts to reduce interaural transmission, and also disproportionately at lower frequencies.  
440 Although this is difficult to disentangle from the middle-ear pressure artefact in older work,  
441 the present study adds considerable strength to that hypothesis. Using closed sound systems



442 sealed to both ear canals, two previous studies, in chicken (Rosowski and Saunders, 1980)  
443 and pigeon (Rosowski, 1979), as well as the present study observed relatively less interaural  
444 transmission at low frequencies. In the starling, interaural transmission was flat up to 3.5  
445 kHz, with only one ear canal sealed to a closed sound delivery system (Klump and Larsen,  
446 1992). In contrast, with open-field stimulation, interaural transmission in the budgerigar was  
447 most effective at about 1 kHz, compared to frequencies above that (Larsen et al., 2006;  
448 Larsen et al., 1997). In dead quail (where the above anesthesia artefact should not have  
449 occurred), a direct comparison of free-field and closed-field stimulation showed the same  
450 relative reduction of transmission at low frequencies, with one ear canal sealed to a closed  
451 sound delivery system (Hill et al., 1980). Such changes under headphone conditions may be  
452 due to restricting the air volume coupled to the external auditory meatus and thus changing  
453 middle-ear stiffness, similar to what has been shown in frogs (Gridi-Papp et al., 2008; Pinder  
454 and Palmer, 1983).

455 Measurements of interaural delay across the head, i.e. the transmission time for sound  
456 between an ipsilateral source and the inside of the contralateral eardrum, typically show  
457 values that are clearly larger than the acoustic travel time across the linear head width. In  
458 chickens, budgerigars, starlings and barn owls, phase measurements of eardrum vibration or  
459 CM yielded estimated interaural delays of 70 to 232  $\mu\text{s}$ , which correspond to 2 to 4 times the  
460 equivalent interaural distances of those birds (Kettler et al., 2016; Larsen et al., 2006;  
461 Rosowski and Saunders, 1980). The present mean value of 264  $\mu\text{s}$  interaural delay for the  
462 chicken also falls within this range, and corresponds to nearly 4 times the equivalent head  
463 width of the chickens used. Perhaps most strikingly, the interaural delay in the chicken was  
464 frequency dependent, with values increasing into the millisecond range at the lowest  
465 frequencies evaluated here, and similar for both acoustic and CM measurements. Two  
466 previous studies, also using closed-system stimulation, extended to similarly low  
467 frequencies. In pigeon CM and acoustic measurements, Rosowski (1979) found a very similar  
468 frequency dependence (converting his phase values to time), with maximal delays of about  
469 600  $\mu\text{s}$  at 160 – 200 Hz, and around 120  $\mu\text{s}$  above 1 kHz. Acoustic measurements in chickens,  
470 however, with the identical technique, found no interaural delay at all for frequencies up to  
471 1 kHz (Rosowski and Saunders, 1980). Clearly, these data sets cannot be reconciled and  
472 currently remain unexplained. Evidence that multiple sound paths across the avian skull

473 exist, have recently led to speculations about how these different paths might interact and  
474 create frequency-dependent phase shifts (Larsen et al., 2016).

475 In summary, interaural transmission and interaural delay are salient parameters that  
476 determine what exactly arrives at the contralateral eardrum after traversing the head. All  
477 the available data agree that sound does not simply travel unimpeded across the avian head  
478 but is attenuated and significantly delayed. The degree of interaural transmission has been  
479 underestimated so far in birds and probably typically peaks for low frequencies around a  
480 gain of 0.5, or -6 dB attenuation. Although this gain is not as high as in lizards who hold the  
481 record of nearly unimpeded interaural transmission (Christensen-Dalsgaard and Manley,  
482 2008), it is of the same order as in frogs and insects (Christensen-Dalsgaard, 2011; Michelsen  
483 and Larsen, 2008) and should put to rest any remaining doubts about the significance of  
484 internal coupling between avian middle ears. However, it is important to emphasize that  
485 under closed-field stimulation, as used here and typically in neurophysiological experiments,  
486 interaural transmission at low frequencies is likely compromised. The interaural delay is  
487 typically several times longer than expected from simply traversing the head width,  
488 consistent with anatomical evidence for complex sound paths through the avian skull. Any  
489 frequency dependence of the interaural delay and possible artefactual alterations remain ill-  
490 characterized and this still makes it in particular difficult to predict the ITD resulting from  
491 internal coupling of avian middle ears.

#### 492 *Extent of binaural ITD enhancement*

493 The present data showed significant internal coupling between the chicken's middle ears.  
494 Furthermore, our measurements clearly suggested an expansion of the ITD range heard,  
495 compared to what was acoustically presented with binaural stimulation, at some of the  
496 frequencies evaluated. However, data obtained under closed-system headphone stimulation  
497 do not directly translate to free-field conditions. As discussed above (see previous section),  
498 interaural transmission is likely compromised with closed-field stimulation at low  
499 frequencies, thus underestimating the potential enhancing effects on ITD. On the other  
500 hand, when changing the position of a sound source under free-field conditions, ILDs occur  
501 in addition to ITDs, while in our headphone experiments, ITDs were presented in isolation.  
502 This will tend to maximize interaural effects, since the sound of a simulated contralateral  
503 source is then only attenuated by the interaural connections and not, in addition, by head

504 and body shadowing. However, compared to the interaural attenuation, the attenuation by  
505 diffraction is the minor component at frequencies up to about 4 kHz (Larsen et al., 2006).

506 Figure 7 validates those assumptions. Here, the prediction from our data, of ITD heard from  
507 sound sources originating 90° to one side, is shown together with published ITDs derived  
508 from CM or eardrum vibration recordings under free-field conditions, for sound sources 90°  
509 to one side, in birds with approximately similar head sizes: Quail (head width 24 mm; Calford  
510 and Piddington, 1988), nankeen kestrel (31 mm; Calford and Piddington, 1988), young  
511 chickens (17 mm; Hyson et al., 1994), budgerigar (16 mm; Larsen et al., 2006), and pigeon  
512 (22 mm; Rosowski, 1979). As expected, the data obtained under free-field conditions mostly  
513 show larger ITDs at low frequencies, below 1 kHz. At higher frequencies, however, our data  
514 are a good match. The comparison supports the notion that, 1) under natural free-field  
515 conditions, ITDs are enhanced by the internally coupled middle ears, 2) increase with  
516 decreasing frequency, and 3) reach at least 200  $\mu$ s in a bird of adult quail or chicken size. The  
517 low-frequency range, below 1 kHz, still shows the largest uncertainties. Currently, it can only  
518 be assumed that the ITD heard continues to rise with decreasing frequency, but the precise  
519 value of the increase remains unknown. Eardrum vibration data do not extend to such low  
520 frequencies, since the velocity measurements typically used are insufficiently sensitive. In  
521 addition, the well-defined free-field presentation of such low frequencies requires large  
522 anechoic chambers, which may explain why most of the classic CM measurements using  
523 free-field stimulation also did not probe such low frequencies. The present study  
524 demonstrated that the use of headphone stimulation is also not an alternative, because this  
525 in itself alters the properties of the internal coupling.

### 526 *Implications for the interpretation of neural recordings*

527 One main motivation for the present study was to clarify the influence of the internally  
528 coupled middle ears of chickens under the standard experimental conditions used during  
529 neurophysiological recordings from neurons involved in ITD processing. In such experiments,  
530 acoustic stimulation through closed sound systems sealed to both ear canals is the norm  
531 because 1), it enables controlled, separate stimulation of the two ears, allowing, e.g., to vary  
532 only ITD, in order to probe the specific selectivity of neurons and 2), a well-defined acoustic  
533 free field is difficult to achieve due to the extensive equipment necessary for invasive

534 neurophysiology and typically surrounding the experimental animal (Michelsen and Larsen,  
535 2008).

536 An important lesson from the present study for the interpretation of neurophysiological data  
537 is that the ITD that is acoustically played by the headphones is not necessarily what is  
538 relayed by the two inner ears and subsequently compared by the binaural brainstem  
539 neurons. In other words, neurophysiological responses are referred to the wrong ITD in such  
540 cases. Furthermore, for tonotopically organized nuclei in which the individual neurons are  
541 also narrowly frequency tuned, the errors introduced may differ between frequency ranges.  
542 The present data suggest that, in the chicken, the ITD range responded to by neurons with  
543 best frequencies between approximately 1.5 and 2.5 kHz will be artificially compressed,  
544 because the ITD heard is significantly larger than that acoustically presented. Conversely,  
545 responses of neurons around 300 Hz will show artificially inflated ITD ranges, because here,  
546 the ITD heard under headphone conditions is actually smaller than that acoustically  
547 presented.

548 One might argue that the errors introduced in that way are small and should not affect  
549 principal findings. However, the debate about what constitutes a physiologically meaningful  
550 ITD response in binaural neurons has a particular and controversial history (e.g., Joris and  
551 Yin, 2007; McAlpine, 2005). Some of it was based on incorrect (too low) assumptions about  
552 the naturally heard ITD-range of animals, both for mammals and birds (see Introduction).  
553 The present study has identified an additional confounding factor in animals with internally  
554 coupled middle ears, i.e. non-mammalian species. Unfortunately, the present results cannot  
555 be assumed to generalize quantitatively to other species, i.e. the specific artefacts  
556 introduced by headphone stimulation need to be identified in each case.

## 557 Acknowledgements

558 I thank Mark Konishi for the generous gift of the software “xdphys” custom-written in his lab  
559 and used in these experiments, and STELS-OL (Scientific and Technical English Language  
560 Services, Oldenburg, Germany, [stels-ol.de](http://stels-ol.de)) for English language editing.

## 561 No competing interests declared

## 562 Funding

563 Supported by the Australian Research Council (ARC, grant DP0984692) and a University of  
564 Sydney R&D grant.

## 565 References

- 566           **Ashida, G. and Carr, C. E.** (2011). Sound localization: Jeffress and beyond. *Current Opinion in*  
567 *Neurobiology* **21**, 745-751.
- 568           **Bierman, H. S., Thornton, J. L., Jones, H. G., Koka, K., Young, B. A., Brandt, C., Christensen-**  
569 **Dalsgaard, J., Carr, C. E. and Tollin, D. J.** (2014). Biophysics of directional hearing in the American  
570 alligator (*Alligator mississippiensis*). *The Journal of experimental biology* **217**, 1094-107.
- 571           **Brown, C. H. and May, B. J.** (2005). Comparative mammalian sound localization. In *Sound*  
572 *Source Localization*, vol. 25 eds. A. N. Popper and R. R. Fay), pp. 124-178. New York: Springer Science  
573 and Business Media, Inc.
- 574           **Calford, M. B. and Piddington, R. W.** (1988). Avian interaural canal enhances interaural  
575 delay. *Journal of Comparative Physiology A - Sensory Neural and Behavioral Physiology* **162**, 503-510.
- 576           **Carr, C. E. and Christensen-Dalsgaard, J.** (2015). Sound Localization Strategies in Three  
577 Predators. *Brain , Behavior and Evolution* **86**, 17-27.
- 578           **Carr, C. E. and Christensen-Dalsgaard, J.** (2016). Evolutionary trends in directional hearing.  
579 *Curr Opin Neurobiol* **40**, 111-117.
- 580           **Christensen-Dalsgaard, J.** (2005). Directional Hearing in Nonmammalian Tetrapods. In *Sound*  
581 *Source Localization*, eds. A. N. Popper and R. R. Fay), pp. 67-123. New York: Springer Science and  
582 Business Media, Inc.
- 583           **Christensen-Dalsgaard, J.** (2011). Vertebrate pressure-gradient receivers. *Hearing Research*  
584 **273**, 37-45.
- 585           **Christensen-Dalsgaard, J. and Manley, G. A.** (2008). Acoustical coupling of lizard eardrums.  
586 *Journal of the Association for Research in Otolaryngology* **9**, 407-416.
- 587           **Counter, S. A. and Borg, E.** (1979). Physiological activation of the stapedius muscle in *Gallus*  
588 *gallus*. *Acta Otolaryngologica (Stockholm)* **403**, 13-19.
- 589           **Gridi-Papp, M., Feng, A. S., Shen, J.-X., Yu, Z.-L., Rosowski, J. J. and Narins, P. M.** (2008).  
590 Active control of ultrasonic hearing in frogs. *Proceedings of the National Academy of Sciences of the*  
591 *United States of America* **105**, 11014-11019.
- 592           **Grothe, B. and Pecka, M.** (2014). The natural history of sound localization in mammals--a  
593 story of neuronal inhibition. *Front Neural Circuits* **8**, 116.
- 594           **Grothe, B., Pecka, M. and McAlpine, D.** (2010). Mechanisms of Sound Localization in  
595 Mammals. *Physiological Reviews* **90**, 983-1012.

- 596           **Hartmann, W. M.** (1999). How we localise sound. *Physics Today* **Nov**, 24-29.
- 597           **Hausmann, L., von Campenhausen, M. and Wagner, H.** (2010). Properties of low-frequency  
598 head-related transfer functions in the barn owl (*Tyto alba*). *Journal of comparative physiology. A,*  
599 *Neuroethology, sensory, neural, and behavioral physiology* **196**, 601-12.
- 600           **Hill, K. G., Lewis, D. B., Hutchings, M. E. and Coles, R. B.** (1980). Directional hearing in the  
601 Japanese quail (*Coturnix coturnix japonica*). I. Acoustic properties of the auditory system. *Journal of*  
602 *Experimental Biology* **86**, 135-151.
- 603           **Hyson, R. L., Overholt, E. M. and Lippe, W. R.** (1994). Cochlear microphonic measurements  
604 of interaural time differences in the chick. *Hearing Research* **81**, 109-118.
- 605           **Jones, H. G., Koka, K., Thornton, J. L. and Tollin, D. J.** (2011). Concurrent Development of the  
606 Head and Pinnae and the Acoustical Cues to Sound Location in a Precocious Species, the Chinchilla  
607 (*Chinchilla lanigera*). *Journal of the Association for Research in Otolaryngology* **12**, 127-140.
- 608           **Joris, P. X. and Yin, T. C. T.** (2007). A matter of time: internal delays in binaural processing.  
609 *Trends in the Neurosciences* **30**, 70-78.
- 610           **Kaiser, A. and Manley, G. A.** (1994). Physiology of single putative cochlear efferents in the  
611 chicken. *The Journal of Neurophysiology* **72**, 2966-2979.
- 612           **Kettler, L., Christensen-Dalsgaard, J., Larsen, O. N. and Wagner, H.** (2016). Low frequency  
613 eardrum directionality in the barn owl induced by sound transmission through the interaural canal.  
614 *Biol Cybern* **110**, 333–343.
- 615           **Klump, G. M.** (2000). Sound localization in birds. In *Comparative Hearing: Birds and Reptiles*,  
616 vol. Springer Handbook of Auditory Research, Vol. 13 eds. R. J. Dooling R. R. Fay and A. N. Popper),  
617 pp. 249-307. New York: Springer Verlag.
- 618           **Klump, G. M. and Larsen, O. N.** (1992). Azimuthal sound localization in the European starling  
619 (*Sturnus vulgaris*): I. Physical binaural cues. *Journal of Comparative Physiology A - Sensory Neural and*  
620 *Behavioral Physiology* **170**, 243-251.
- 621           **Köppl, C.** (2009). Evolution of sound localisation in land vertebrates. *Current Biology* **19**,  
622 R635-R639.
- 623           **Köppl, C. and Carr, C. E.** (2008). Maps of interaural time difference in the chicken's brainstem  
624 nucleus laminaris. *Biological Cybernetics* **98**, 541–559.
- 625           **Köppl, C. and Gleich, O.** (2007). Evoked cochlear potentials in the barn owl. *Journal of*  
626 *Comparative Physiology A - Sensory Neural and Behavioral Physiology* **193**, 601-612.

- 627           **Kuhn, G. F.** (1977). Model for the interaural time differences in the azimuthal plane. *Journal*  
628 *of the Acoustical Society of America* **62**, 157-167.
- 629           **Larsen, O. N., Christensen-Dalsgaard, J. and Jensen, K. K.** (2016). Role of intracranial cavities  
630 in avian directional hearing. *Biol Cybern* **110**, 319–331.
- 631           **Larsen, O. N., Dooling, R. J. and Michelsen, A.** (2006). The role of pressure difference  
632 reception in the directional hearing of budgerigars (*Melopsittacus undulatus*). *Journal of Comparative*  
633 *Physiology A - Sensory Neural and Behavioral Physiology* **192**, 1063–1072.
- 634           **Larsen, O. N., Dooling, R. J. and Ryals, B. M.** (1997). Roles of intracranial air pressure in bird  
635 audition. In *Diversity in auditory mechanics*, eds. E. R. Lewis G. R. Long R. F. Lyon P. M. Narins C. R.  
636 Steele and E. Hecht-Poinar), pp. 11-17. Singapore: World scientific publishing.
- 637           **Lewald, J.** (1990). The directionality of the ear of the pigeon (*Columba livia*). *Journal of*  
638 *Comparative Physiology A - Sensory Neural and Behavioral Physiology* **167**, 533-543.
- 639           **Maki, K. and Furukawa, S.** (2005). Acoustical cues for sound localization by the Mongolian  
640 gerbil, *Meriones unguiculatus*. *Journal of the Acoustical Society of America* **118**, 872-886.
- 641           **McAlpine, D.** (2005). Creating a sense of auditory space. *Journal of Physiology-London* **566**,  
642 21-28.
- 643           **Michelsen, A. and Larsen, O. N.** (2008). Pressure difference receiving ears. *Bioinspiration &*  
644 *Biomimetics* **3**, 011001 (18pp).
- 645           **Moiseff, A.** (1989). Binaural disparity cues available to the barn owl for sound localization.  
646 *Journal of Comparative Physiology A - Sensory Neural and Behavioral Physiology* **164**, 629-636.
- 647           **Owen, P.** (1850). On the Communications between the Cavity of the Tympanum and the  
648 Palate in the Crocodilia (Gavials, Alligators and Crocodiles). *Philosophical Transactions of the Royal*  
649 *Society of London* **140**, 521-527.
- 650           **Pinder, A. C. and Palmer, A. R.** (1983). Mechanical properties of the frog ear: vibration  
651 measurements under free- and closed-field acoustic conditions. *Proceedings of the Royal Society of*  
652 *London - Series B: Biological Sciences* **219**, 371-396.
- 653           **Poganiatz, I., Nelken, I. and Wagner, H.** (2001). Sound-Localization Experiments with Barn  
654 Owls in Virtual Space: Influence of Interaural Time Difference on Head-Turning Behavior. *Journal of*  
655 *the Association for Research in Otolaryngology* **2**, 1-21.
- 656           **Rosowski, J. J.** (1979). The interaural pathway of the pigeon and sound localization: Does the  
657 pigeon ear act as a differential pressure transducer? PhD thesis, University of Pennsylvania.



- 658           **Rosowski, J. J. and Saunders, J. C.** (1980). Sound transmission through the avian interaural  
659 pathways. *The Journal of Comparative Physiology* **136**, 183-190.
- 660           **Schnyder, H. A., Vanderelst, D., Bartenstein, S., Firzlaff, U. and Luksch, H.** (2014). The avian  
661 head induces cues for sound localization in elevation. *PLoS one* **9**, e112178.
- 662           **Schwartzkopff, J.** (1952). Untersuchungen über die Arbeitsweise des Mittelohres und das  
663 Richtungshören der Singvögel unter Verwendung von Cochlea-Potentialen. *Zeitschrift für*  
664 *vergleichende Physiologie* **34**, 46-68.
- 665           **Sterbing, S. J., Hartung, K. and Hoffmann, K. P.** (2003). Spatial Tuning to Virtual Sounds in  
666 the Inferior Colliculus of the Guinea Pig. *Journal of Neurophysiology* **90**, 2648–2659.
- 667           **Tollin, D. J. and Koka, K.** (2009). Postnatal development of sound pressure transformations  
668 by the head and pinnae of the cat: Binaural characteristics. *Journal of the Acoustical Society of*  
669 *America* **126**, 3125–3136.
- 670           **Viete, S., Peña, J. L. and Konishi, M.** (1997). Effects of interaural intensity difference on the  
671 processing of interaural time difference in the owl's nucleus laminaris. *The Journal of Neuroscience*  
672 **17**, 1815-1824.
- 673           **von Campenhausen, M. and Wagner, H.** (2006). Influence of the facial ruff on the sound-  
674 receiving characteristics of the barn owl's ears. *Journal of Comparative Physiology a-Neuroethology*  
675 *Sensory Neural and Behavioral Physiology* **192**, 1073-1082.
- 676           **Vonderschen, K. and Wagner, H.** (2014). Detecting interaural time differences and  
677 remodeling their representation. *Trends Neurosci* **37**, 289-300.
- 678           **Wada, Y.** (1924). Beiträge zur vergleichenden Physiologie des Gehörorganes. *Pflügers Archiv -*  
679 *European Journal of Physiology* **202**, 46-69.

680 **Figures:**

681 Fig. 1: CM behavior with monaural ipsilateral stimulation of increasing sound level, at 4  
682 different frequencies. Top row of panels: CM amplitude (in  $\mu\text{V}$ ) as a function of level, at 100,  
683 571, 1515 and 2500 Hz. Each panel shows raw data from both ears of 8 chickens, the solid  
684 line joins the median values at each level. Bottom row of panels: CM phase as a function of  
685 sound level.

686 Fig. 2A: Cartoon illustration of same-ear comparison used to derive interaural transmission  
687 and delay. CM recordings from the same ear were compared (indicated by the red star), in  
688 response to monaural stimulation of the ipsi- or contralateral ear (indicated by solid gray  
689 earphone).

690 B: Interaural transmission gain, i.e. the ratio of contra- to ipsilateral CM amplitude, at 70 dB  
691 SPL. Shown are individual measurements from both ears of 8 chickens. The solid line joins  
692 the median values at each standard frequency.

693 Fig. 3: Measurements of interaural delay. A: Phase of the CM with contralateral stimulation  
694 at 70 dB SPL, unwrapped over different frequencies. Shown are raw data from both ears of  
695 8 chickens. The solid line is a linear regression ( $y = 117.16 + 0.095x$ ,  $r = 0.82$ ,  $p < 0.001$ ,  $n = 99$ )  
696 the slope of which corresponds to a constant delay of 264  $\mu\text{s}$ . B: Interaural delay derived  
697 from same-ear comparisons as illustrated in Fig. 2A. Phase differences were converted to  
698 time delays. The solid line joins median values at each standard frequency.

699 Fig. 4: Modulation of CM amplitude upon binaural stimulation with varying ITD. A: Example  
700 of simultaneous CM recordings in both ears of an individual chicken, stimulated at 2 kHz and  
701 70 dB SPL. Both CM recordings clearly modulated in amplitude as a function of ITD;  
702 modulation ratios were 1.63 (left) and 2.35 (right). Note the complete absence of  
703 modulation after blockage of the interaural connections (data shown in red; modulation  
704 ratio 1.02). B: ITD modulation ratios for all measurements in all ears (8 chickens), at two  
705 different sound levels, 50 dB SPL (blue circles) and 70 dB SPL (black circles). The solid line  
706 joins the median values for 70 dB SPL at each standard frequency. C: ITD modulation ratios  
707 at 70 dB SPL, after blockage of the interaural connections in 3 chickens.

708 Fig. 5: Two examples of the derivation of “ITD heard”. A-D: An example with binaural  
709 stimulation at 100 Hz, 70 dB SPL. E-H: An example with binaural stimulation at 1515 Hz, 50  
710 dB SPL. The top panels (A, E) show the raw phases of the simultaneously recorded left and  
711 right CMs (grey symbols and lines, refer to left ordinate), as a function of the acoustically  
712 presented ITD, varied over  $\pm$  one period of the stimulation frequency. Black symbols and  
713 lines represent the difference between the unwrapped left and right CM phases (refer to  
714 right ordinate). The next panels (B, F) show the phase differences converted to time  
715 difference, termed the ITD heard, as a function of the acoustically presented ITD. The solid  
716 lines are linear regressions to the data points, the dashed line indicates identical values for  
717 presented and heard ITD, for reference. Note that the data show both a constant offset and  
718 an ITD-varying deviation from this reference. The constant offset is represented by the y-axis  
719 intercept of the linear regression. For the data shown in the panels C and G, the constant  
720 offset has been subtracted, and the remaining deviation of the ITD heard from the ITD  
721 acoustically presented is shown as a function of the acoustically presented ITD. Note that the  
722 largest deviations occurred near the acoustic midline. Finally, panels D and H plot the ratio of  
723 ITD heard / ITD presented acoustically, for the same data.

724 Fig. 6: Median ratios of ITD heard / ITD presented acoustically. Data for 4 different  
725 frequencies are shown: 100, 333, 1515 and 2500 Hz, in successive panel rows. The two  
726 columns of panels show data for two different sound levels: 50 dB SPL (left) and 70 dB SPL  
727 (right). Medians and interquartile ranges are plotted as a function of the acoustically  
728 presented ITD. Vertical dashed lines indicate the acoustic midline, i.e. zero ITD, and  
729 horizontal dashed lines indicate identical values for ITD heard and ITD presented, i.e. a ratio  
730 of 1, for reference. Note that ratios above 1 indicate a larger ITD heard, ratios below 1 a  
731 smaller ITD heard. Note that this kind of plot highlights whether a deviation would increase  
732 the perceived ITD range (ratios  $> 1$ ) or compress it (ratios  $< 1$ ). At 100, 1515 and 2500 Hz, the  
733 effect was an enhancing one. However, at 333 Hz, the effect was compressive. Note also  
734 that at most frequencies, ratios were greater at the lower sound level of 50 dB SPL.

735 Fig. 7: ITD heard from a sound source  $90^\circ$  to one side of an animal in the free field, as a  
736 function of frequency. Data shown in black are from published sources, distinguished by  
737 different symbols: Quail (head width 24 mm; Calford and Piddington, 1988), nankeen kestrel  
738 (31 mm; Calford and Piddington, 1988), young chicken (17 mm; Hyson et al., 1994), pigeon

739 (22 mm according to Lewald, 1990; data shown are from Rosowski, 1979), and budgerigar  
740 (16 mm; Larsen et al., 2006). In blue, is shown a prediction from the present data, obtained  
741 with closed-system stimulation, by assuming a uniform acoustic ITD of 130  $\mu$ s between the  
742 two ear canals. Any deviation from a flat line in such a plot suggests significant internal  
743 coupling of middle ears. Note the very similar trends of all datasets at frequencies above 1.5  
744 kHz, but the much larger variation at lower frequencies, most prominently the markedly  
745 reduced ITD enhancement with closed-system stimulation in the present study.

746 Fig. 8: Measurements of acoustic interaural transmission and delay, using microphones in  
747 the outer ear canals, in a subset of 3 chickens. A: Acoustic transmission gain, derived in an  
748 analogous way to the CM data shown in Fig. 2B. B: Phase accumulation at the microphone  
749 contralateral to the simulation, analogous to the CM data shown in Fig. 3A. Note that above  
750 1.8 kHz, virtually no phase accumulation occurred, suggesting direct electrical cross-talk  
751 between microphone channels. This data range is therefore shown grey in all panels. The  
752 solid lines represent linear regressions to the data below and above 1.8 kHz, respectively.  
753 The slope of the low-frequency regression corresponds to a constant delay of 544  $\mu$ s. C:  
754 Phase difference between the microphone readings with monaural stimulation from the ipsi-  
755 or contralateral ear. Two different analyses are shown: either taking the minimal phase  
756 difference (blue symbols and line) or assuming that there should be a consistent ipsi lead  
757 and phase roll-off across frequencies (black symbols and line). The solid lines join median  
758 values at each standard frequency. D: The phase differences from C, converted to interaural  
759 time delays.

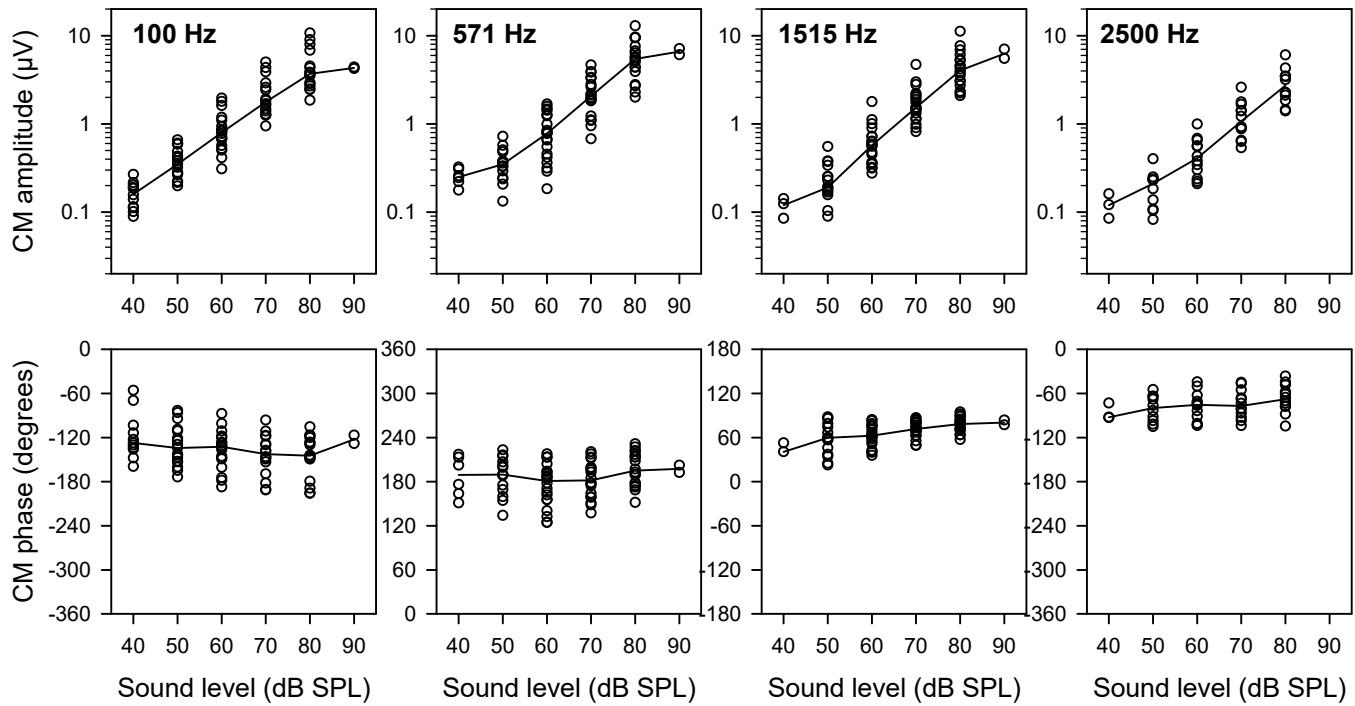

**Figure 1:** CM behavior with monaural ipsilateral stimulation of increasing sound level, at 4 different frequencies. Top row of panels: CM amplitude (in  $\mu\text{V}$ ) as a function of level, at 100, 571, 1515 and 2500 Hz. Each panel shows raw data from both ears of 8 chickens, the solid line joins the median values at each level. Bottom row of panels: CM phase as a function of sound level.

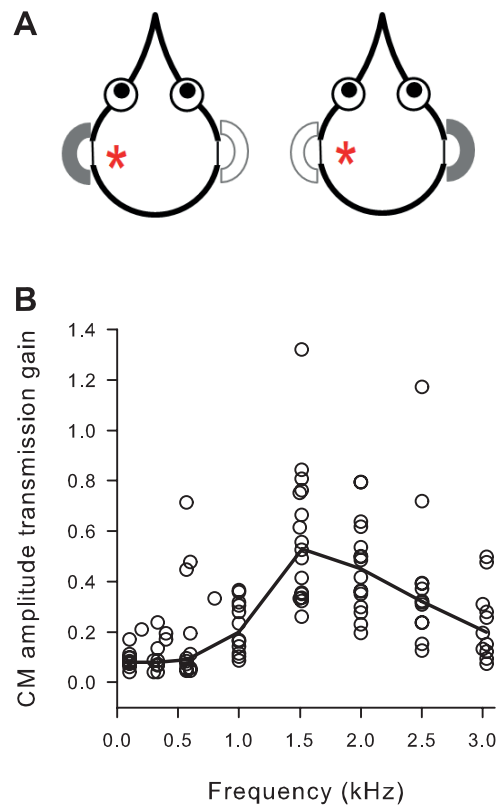

**Figure 2A:** Cartoon illustration of same-ear comparison used to derive interaural transmission and delay. CM recordings from the same ear were compared (indicated by the red star), in response to monaural stimulation of the ipsi- or contralateral ear (indicated by solid gray earphone).

**B:** Interaural transmission gain, i.e. the ratio of contra- to ipsilateral CM amplitude, at 70 dB SPL. Shown are individual measurements from both ears of 8 chickens. The solid line joins the median values at each standard frequency.

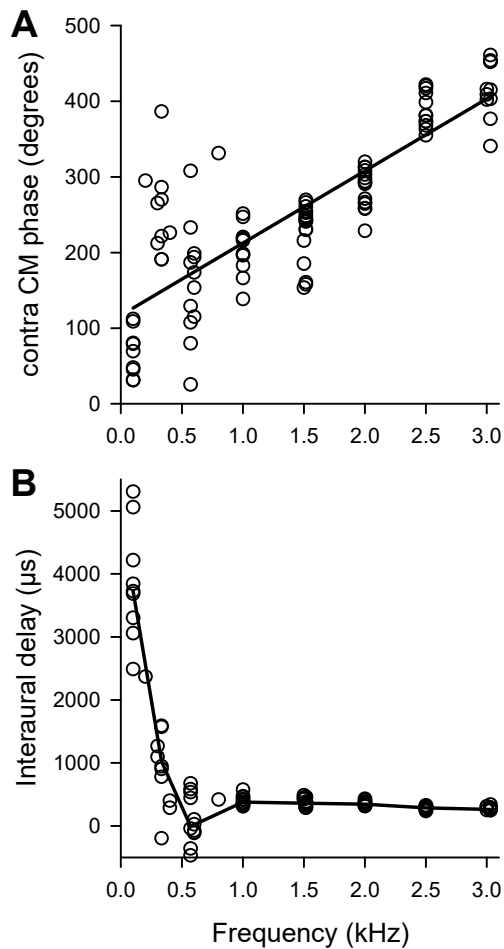

**Figure 3:** CMeasurements of interaural delay. **A:** Phase of the CM with contralateral stimulation at 70 dB SPL, unwrapped over different frequencies. Shown are raw data from both ears of 8 chickens. The solid line is a linear regression ( $y = 117.16 + 0.095x$ ,  $r = 0.82$ ,  $p < 0.001$ ,  $n = 99$ ) the slope of which corresponds to a constant delay of 264  $\mu\text{s}$ . **B:** Interaural delay derived from same-ear comparisons as illustrated in Fig. 2A. Phase differences were converted to time delays. The solid line joins median values at each standard frequency.

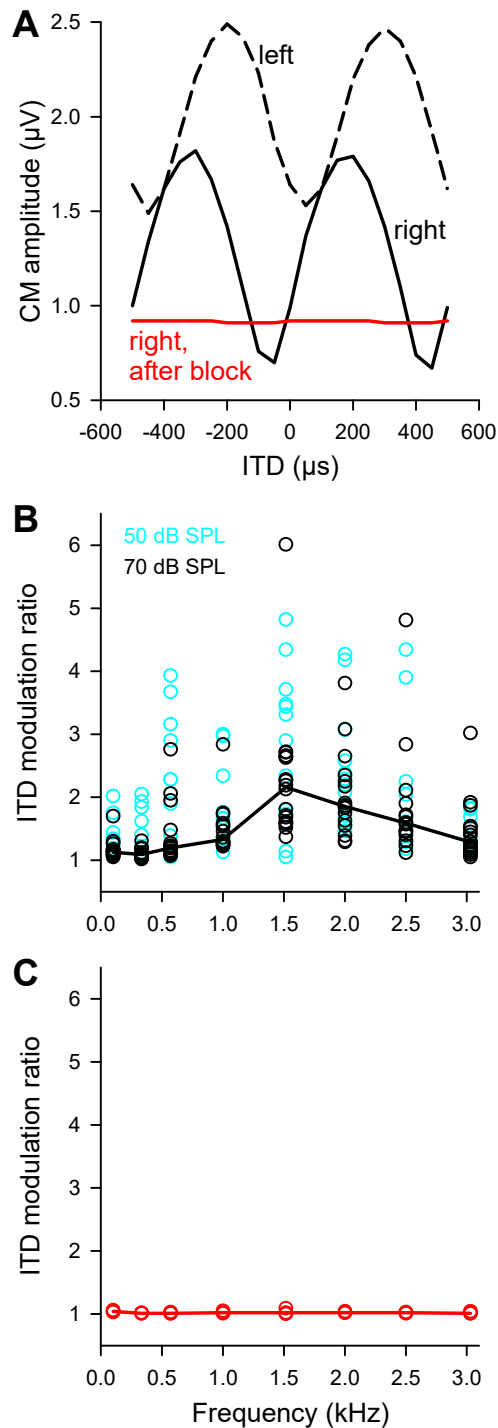

**Figure 4:** Modulation of CM amplitude upon binaural stimulation with varying ITD. **A:** Example of simultaneous CM recordings in both ears of an individual chicken, stimulated at 2 kHz and 70 dB SPL. Both CM recordings clearly modulated in amplitude as a function of ITD; modulation ratios were 1.63 (left) and 2.35 (right). Note the complete absence of modulation after blockage of the interaural connections (data shown in red; modulation ratio 1.02). **B:** ITD modulation ratios for all measurements in all ears (8 chickens), at two different sound levels, 50 dB SPL (blue circles) and 70 dB SPL (black circles). The solid line joins the median values for 70 dB SPL at each standard frequency. **C:** ITD modulation ratios at 70 dB SPL, after blockage of the interaural connections in 3 chickens.



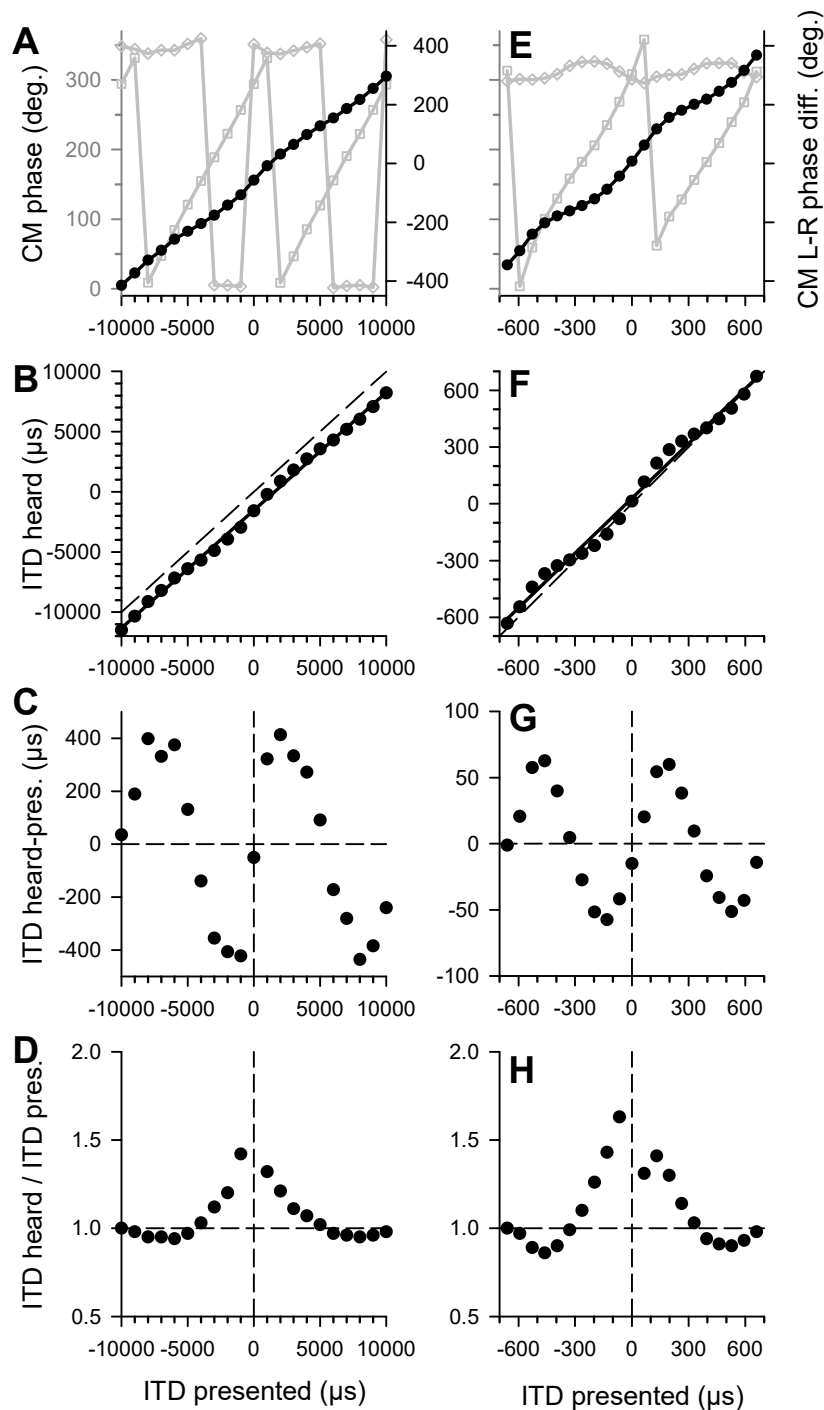

**Figure 5:** Two examples of the derivation of “ITD heard”. **A-D:** An example with binaural stimulation at 100 Hz, 70 dB SPL. **E-H:** An example with binaural stimulation at 1515 Hz, 50 dB SPL. The top panels (**A, E**) show the raw phases of the simultaneously recorded left and right CMs (grey symbols and lines, refer to left ordinate), as a function of the acoustically presented ITD, varied over  $\pm$  one period of the stimulation frequency. Black symbols and lines represent the difference between the unwrapped left and right CM phases (refer to right ordinate). The next panels (**B, F**) show the phase differences converted to time difference, termed the ITD heard, as a function of the acoustically presented ITD. The solid lines are linear regressions to the data points, the dashed line indicates identical values for presented and heard ITD, for reference. Note that the data show both a constant offset and an ITD-varying deviation from this reference. The constant offset is represented by the y-axis intercept of the linear regression. For the data shown in the panels **C and G**, the constant offset has been subtracted, and the remaining deviation of the ITD heard from the ITD acoustically presented is shown as a function of the acoustically presented ITD. Note that the largest deviations occurred near the acoustic midline. Finally, panels **D and H** plot the ratio of ITD heard / ITD presented acoustically, for the same data.

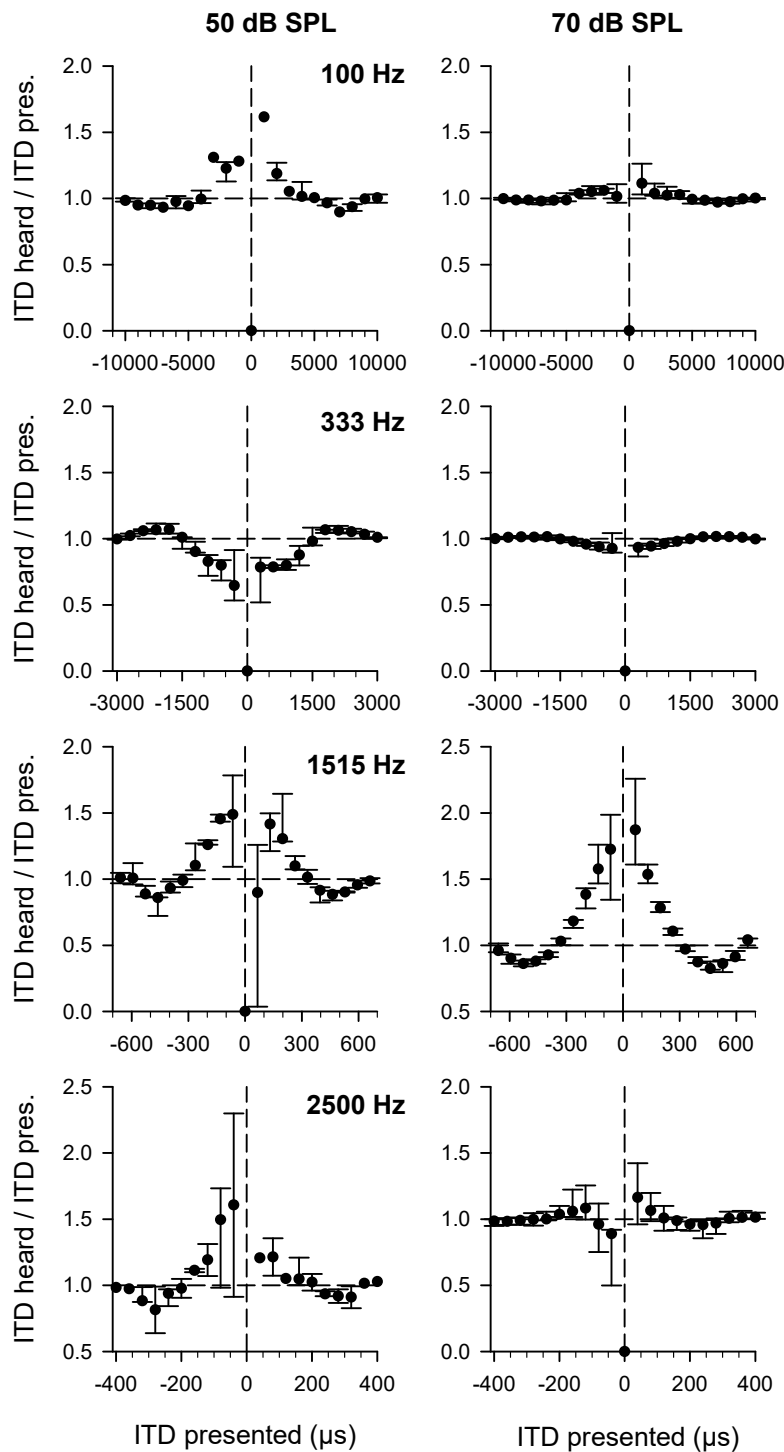

**Figure 6:** Median ratios of ITD heard / ITD presented acoustically. Data for 4 different frequencies are shown: 100, 333, 1515 and 2500 Hz, in successive panel rows. The two columns of panels show data for two different sound levels: 50 dB SPL (left) and 70 dB SPL (right). Medians and interquartile ranges are plotted as a function of the acoustically presented ITD. Vertical dashed lines indicate the acoustic midline, i.e. zero ITD, and horizontal dashed lines indicate identical values for ITD heard and ITD presented, i.e. a ratio of 1, for reference. Note that ratios above 1 indicate a larger ITD heard, ratios below 1 a smaller ITD heard. Note that this kind of plot highlights whether a deviation would increase the perceived ITD range (ratios > 1) or compress it (ratios < 1). At 100, 1515 and 2500 Hz, the effect was an enhancing one. However, at 333 Hz, the effect was compressive. Note also that at most frequencies, ratios were greater at the lower sound level of 50 dB SPL.

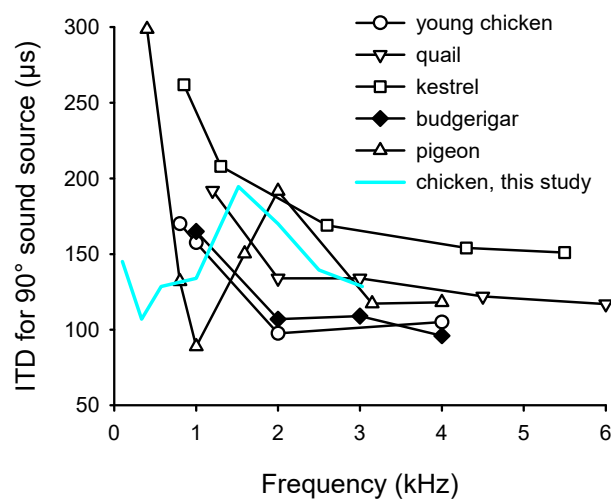

**Figure 7:** ITD heard from a sound source 90° to one side of an animal in the free field, as a function of frequency. Data shown in black are from published sources, distinguished by different symbols: Quail (head width 24 mm; Calford and Piddington, 1988), nankeen kestrel (31 mm; Calford and Piddington, 1988), young chicken (17 mm; Hyson et al., 1994), pigeon (22 mm according to Lewald, 1990; data shown are from Rosowski, 1979), and budgerigar (16 mm; Larsen et al., 2006). In blue, is shown a prediction from the present data, obtained with closed-system stimulation, by assuming a uniform acoustic ITD of 130  $\mu$ s between the two ear canals. Any deviation from a flat line in such a plot suggests significant internal coupling of middle ears. Note the very similar trends of all datasets at frequencies above 1.5 kHz, but the much larger variation at lower frequencies, most prominently the markedly reduced ITD enhancement with closed-system stimulation in the present study.

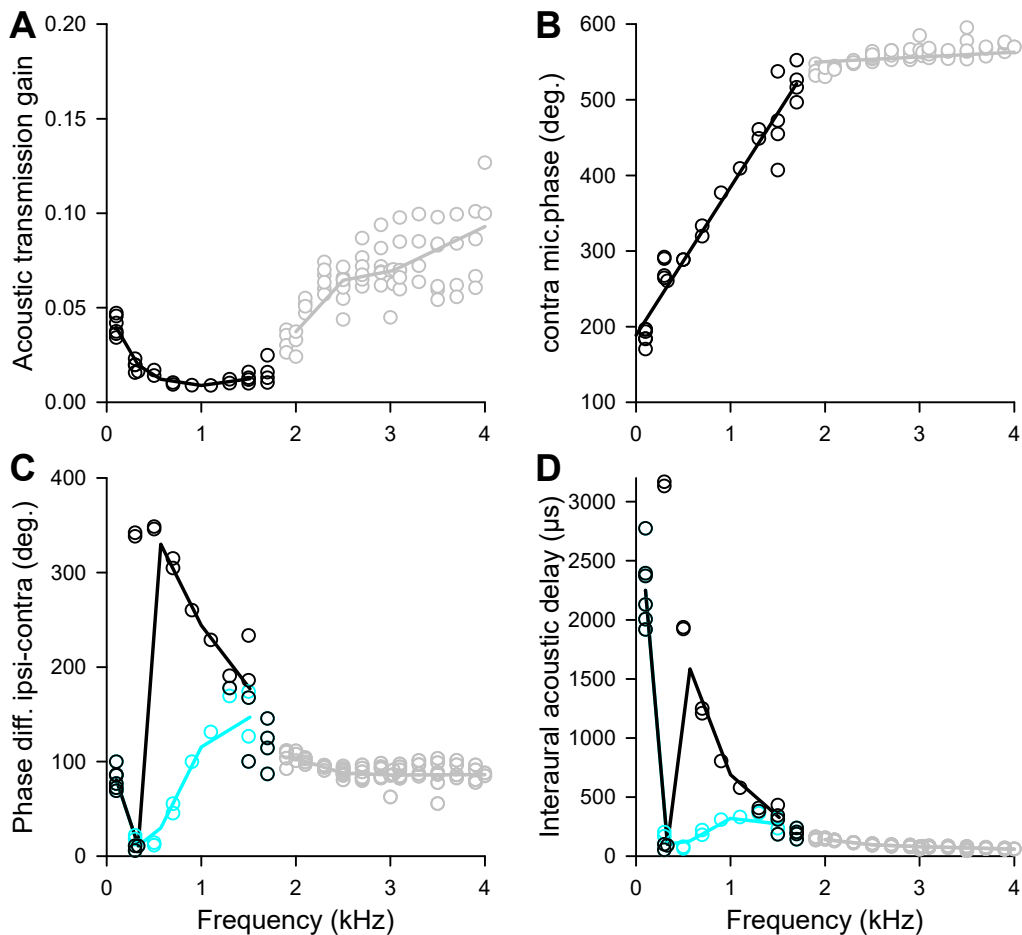

**Figure 8:** Measurements of acoustic interaural transmission and delay, using microphones in the outer ear canals, in a subset of 3 chickens. A: Acoustic transmission gain, derived in an analogous way to the CM data shown in Fig. 2B. B: Phase accumulation at the microphone contralateral to the stimulation, analogous to the CM data shown in Fig. 3A. Note that above 1.8 kHz, virtually no phase accumulation occurred, suggesting direct electrical cross-talk between microphone channels. This data range is therefore shown grey in all panels. The solid lines represent linear regressions to the data below and above 1.8 kHz, respectively. The slope of the low-frequency regression corresponds to a constant delay of 544  $\mu$ s. C: Phase difference between the microphone readings with monaural stimulation from the ipsi- or contralateral ear. Two different analyses are shown: either taking the minimal phase difference (blue symbols and line) or assuming that there should be a consistent ipsi lead and phase roll-off across frequencies (black symbols and line). The solid lines join median values at each standard frequency. D: The phase differences from C, converted to interaural time delays.
